# Supplementary material for: Clinical study of intraoperative real-time measurement in predicting successful removal of stone fragments during retrograde intra-renal surgery
Source: Research Square preprint supplement (doi:10.21203/rs.3.rs-2440977/v1), 2023-01-06
Supplement: Supplementary file 1 [file aa59a50300510a7e8814f305.xlsx]

## Sheet: Sheet1
Supplement 1. Perioperative data of patients
Items	Value
Age (years)	46.4 ± 13.3
Sex	Male: 3(60%)
	Female: 2 (40%)
Side	Left: 3 (60%)
	Right: 2 (40%)
Location	Ureteral: 2 (40%)
	Renal: 1 (20%)
	Ureteral + Renal: 2 (40%)
No. of pre-op stone	Single: 3 (60%)
	Multiple: 2 (40%)
Pre-op stone measurement (mm)	11.2 ± 3.5
Pre-stend	5 (100%)
Ureteral access sheath used	5 (100%)
Ureteral access sheath secondary adjustment	1 (20%)
